# Supplementary material for: Therapeutic potential of anamorelin, a novel, oral ghrelin mimetic, in patients with cancer-related cachexia: a multicenter, randomized, double-blind, crossover, pilot study
Source: Springer Nature journal article supplement (doi:10.1007/s00520-012-1500-1), 2012-06-16
Supplement: 520_2012_1500_MOESM1_ESM.pdf [file 520_2012_1500_MOESM1_ESM.pdf]

## **ONLINE RESOURCE: SUPPLEMENTARY DATA**

**JOURNAL:** Supportive Care in Cancer

**TITLE:** Therapeutic potential of anamorelin, a novel, oral ghrelin mimetic, in patients with cancer-related cachexia: a multicenter, randomized, double-blind, crossover, pilot study

**Authors:** José M. Garcia, John Friend, Suzan Allen

**Corresponding author:**

José M. Garcia, MD, PhD

Baylor College of Medicine

Division of Endocrinology, Diabetes and Metabolism *and*

Michael E. DeBakey Veterans Affairs Medical Center

2002 Holcombe Boulevard, Building 109, Room 210

Houston, Texas 77030, USA

Phone: 713-794-7989

Fax: 713-794-7771

E-mail: Jgarcia1@bcm.edu

**Online Resource Table S1** Anderson Symptom Assessment Scale (ASAS) [24, 25]

ASAS was administered to patients during screening, before study day 1, and on the final day of each study period.

| Patient-reported measurement/items | Mean baseline value (n=16) | Mean change after 3 days of anamorelin treatment (n=15) | Mean change after 3 days of placebo treatment (n=16) | 95% Confidence interval | <i>p</i> Value      |
|------------------------------------|----------------------------|---------------------------------------------------------|------------------------------------------------------|-------------------------|---------------------|
| Pain                               | 6.69                       | 0.13                                                    | 0.31                                                 | −1.1 to 0.9             | 0.901               |
| Fatigue                            | 5.50                       | 1.47                                                    | 0.38                                                 | −0.2 to 2.1             | 0.116               |
| Nausea                             | 8.63                       | 0.33                                                    | −0.38                                                | 0.0 to 1.7              | 0.076               |
| Depression                         | 8.25                       | 0.93                                                    | 0.50                                                 | −0.2 to 1.0             | 0.218               |
| Anxiety                            | 8.13                       | 0.73                                                    | 0.31                                                 | −0.3 to 1.3             | 0.267               |
| Drowsiness                         | 7.19                       | 0.60                                                    | −0.50                                                | 0.2 to 1.9              | 0.039 <sup>a</sup>  |
| Shortness of breath                | 7.25                       | 0.27                                                    | −0.13                                                | −0.7 to 1.4             | 0.558               |
| Appetite                           | 4.00                       | 2.67                                                    | 0.50                                                 | 0.7 to 3.3              | 0.011 <sup>a</sup>  |
| Sleep                              | 4.94                       | 0.73                                                    | 0.50                                                 | −0.2 to 0.8             | 0.253               |
| Feeling of well-being              | 5.88                       | 0.20                                                    | −0.50                                                | −0.1 to 1.6             | 0.103               |
| <b>ASAS total score</b>            | 66.44                      | 8.07                                                    | 1.00                                                 | 3.5 to 10.3             | <0.002 <sup>a</sup> |

<sup>a</sup>Statistically significant for treatment. All statistical tests were performed as 2-tailed tests at the 0.05 level of significance unless otherwise specified. A nominal *p* value was reported without adjustment for multiplicity. Missing data were not imputed. (Please see the Statistical Analysis section under Methods in the article for complete description of statistical analysis.)

**Online Resource Table S2** Functional assessment of chronic illness therapy with additional fatigue domain (FACIT-F) [26]

The FACIT-F was administered to patients during screening, before study day 1, and on the final day of each study period.

| Patient-reported measurement/items | Mean baseline value<br>( <i>n</i> =16) | Mean change after 3 days of anamorelin treatment<br>( <i>n</i> =15) | Mean change after 3 days of placebo treatment<br>( <i>n</i> =16) | 95% Confidence interval | <i>p</i> Value     |
|------------------------------------|----------------------------------------|---------------------------------------------------------------------|------------------------------------------------------------------|-------------------------|--------------------|
| Physical well-being                | 16.75                                  | 4.40                                                                | 2.94                                                             | −0.2 to 3.5             | 0.105              |
| Social/family well-being           | 17.69                                  | 0.60                                                                | 0.44                                                             | −1.3 to 1.4             | 0.920              |
| Emotional well-being               | 17.56                                  | 1.40                                                                | 0.94                                                             | −0.4 to 1.5             | 0.302              |
| Functional well-being              | 14.31                                  | 0.67                                                                | −0.44                                                            | −0.6 to 2.5             | 0.265              |
| Additional concerns                | 29.06                                  | 6.13                                                                | 2.44                                                             | 0.2 to 6.3              | 0.06               |
| <b>FACIT-F total score</b>         | 95.38                                  | 13.20                                                               | 6.31                                                             | 1.8 to 11.3             | 0.018 <sup>a</sup> |

<sup>a</sup>Statistically significant for treatment. All statistical tests were performed as 2-tailed tests at the 0.05 level of significance unless otherwise specified. A nominal *p* value was reported without adjustment for multiplicity. Missing data were not imputed. (Please see the Statistical Analysis section under Methods in the article for complete description of statistical methods.)

**Online Resource Table S3** Bristol-Myers Anorexia/Cachexia Recovery Instrument–7 Questions (BACRI-7) [27]

The BACRI-7 was administered on the last day of each period because it assesses subjective patient-perceived improvement in anorexia and cachexia.

| Patient-reported measurement/items                                                                                                    | Mean scores<br>after 3 days of<br>anamorelin<br>treatment<br>( <i>n</i> =15) | Mean scores<br>after 3 days of<br>placebo<br>treatment<br>( <i>n</i> =16) | 95%<br>Confidence<br>interval | <i>p</i> Value     |
|---------------------------------------------------------------------------------------------------------------------------------------|------------------------------------------------------------------------------|---------------------------------------------------------------------------|-------------------------------|--------------------|
| Since you began treatment with the test drug, do you feel that any change in weight has had a significant impact on your health?      | 65.00                                                                        | 56.44                                                                     | 0.6 to 15.2                   | 0.053              |
| To what extent has your appearance changed since treatment was started?                                                               | 63.67                                                                        | 52.56                                                                     | 3.0 to 20.0                   | 0.020 <sup>a</sup> |
| Based on comments from friends, co-workers, and loved ones, how do you feel your appearance has changed since the start of treatment? | 35.47                                                                        | 31.56                                                                     | −9.6 to 15.5                  | 0.649              |
| To what extent has your appetite changed since the start of treatment?                                                                | 67.73                                                                        | 61.75                                                                     | −3.7 to 16.1                  | 0.240              |
| Do you enjoy eating more or less than before treatment began?                                                                         | 65.27                                                                        | 57.31                                                                     | 0.9 to 15.9                   | 0.046 <sup>a</sup> |
| Do you think treatment has been of benefit to you?                                                                                    | 66.27                                                                        | 64.44                                                                     | −7.8 to 12.1                  | 0.675              |
| Since beginning treatment, has your quality of life become better or worse?                                                           | 62.13                                                                        | 59.13                                                                     | −5.5 to 13.0                  | 0.443              |
| <b>BACRI-7 total score</b>                                                                                                            | 454.60                                                                       | 420.06                                                                    | −6.7 to 81.8                  | 0.120              |

<sup>a</sup>Statistically significant for treatment. All statistical tests were performed as 2-tailed tests at the 0.05 level of significance unless otherwise specified. A nominal *p* value was reported without adjustment for multiplicity. Missing data were not imputed. (Please see the Statistical Analysis section under Methods in the article for complete description of statistical methods.)

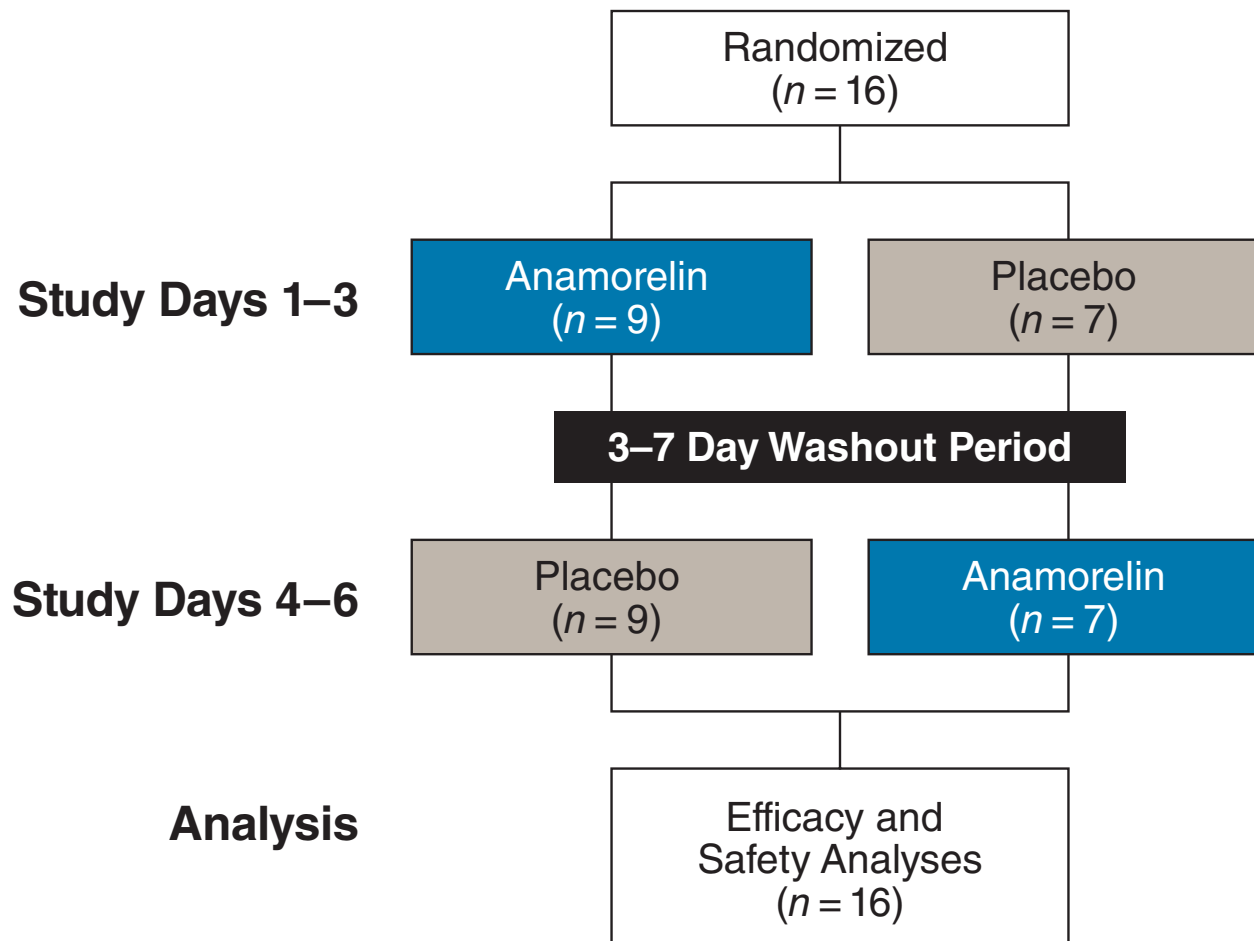

**Fig. S1** Study design and patient disposition
